# Supplementary material for: PTX3 mediates the infiltration, migration, and inflammation‐resolving‐polarization of macrophages in glioblastoma
Source: PubMed Central journal article supplement (PMC9532932; doi:10.1111/cns.13913), 2022-07-20
Supplement: CNS-28-1748-s003.pdf [file CNS-28-1748-s003.pdf]

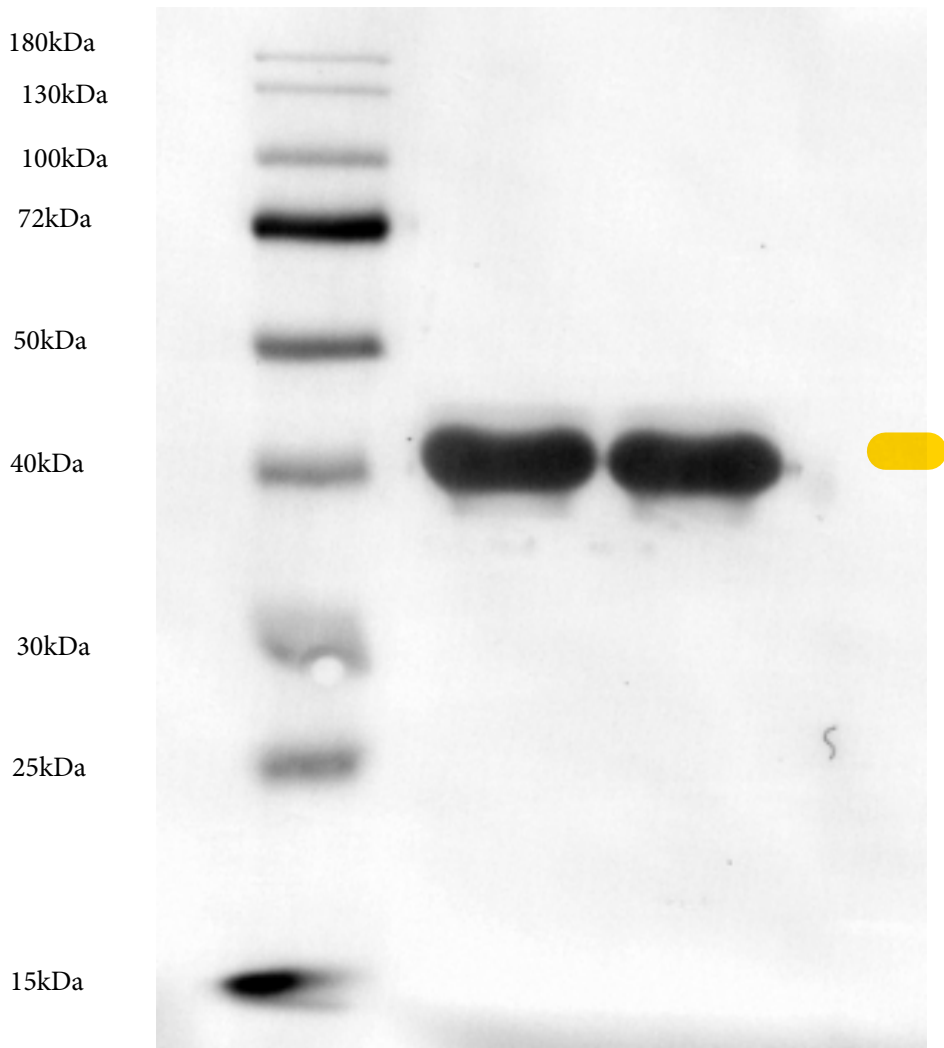

Full unedited gel/blot for Figure 7A:  $\beta$ -actin

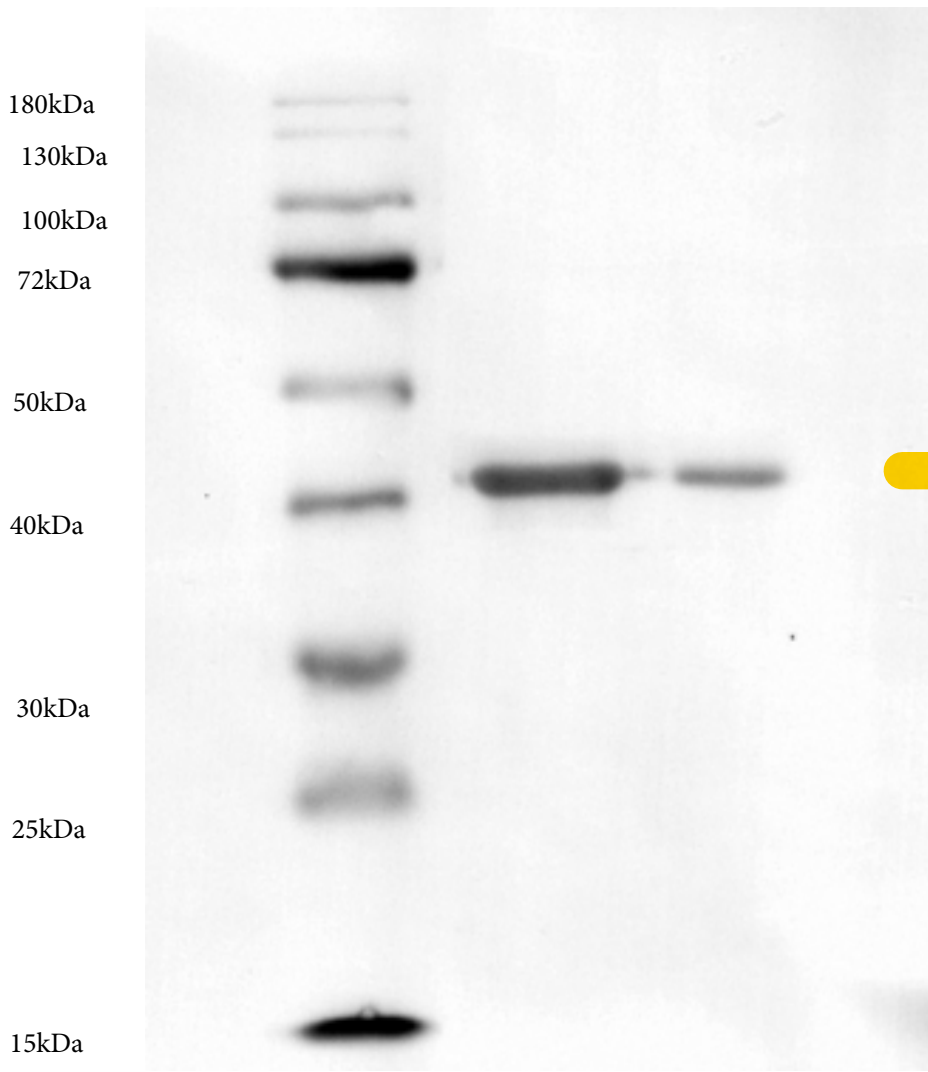

Full unedited gel/blot for Figure 7A: PTX3

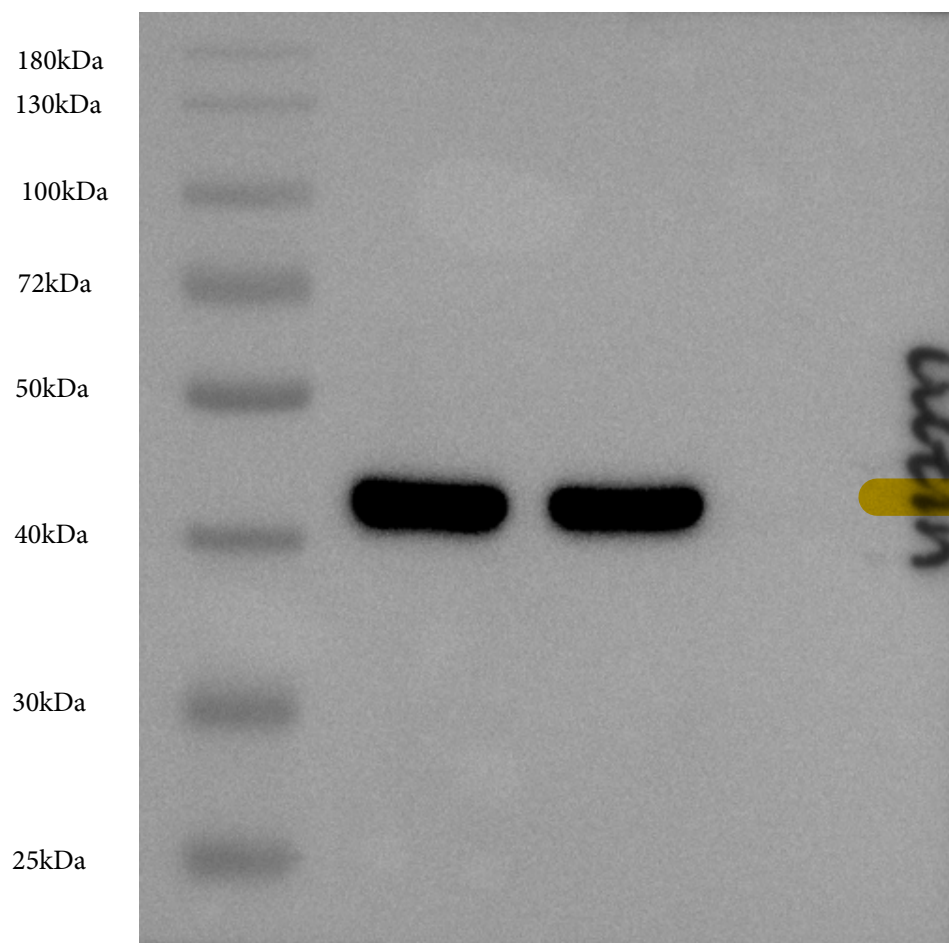

Full unedited gel/blot for Figure 8A:  $\beta$ -actin

180kDa  
130kDa  
100kDa  
72kDa  
50kDa  
40kDa  
30kDa  
25kDa

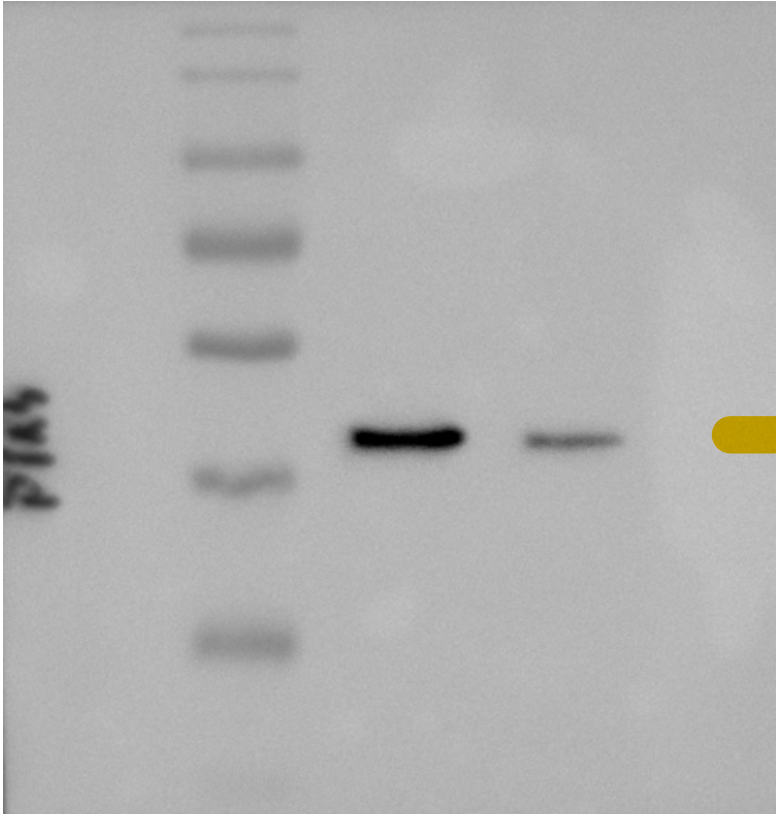

Full unedited gel/blot for Figure 8A: PTX3
